# Supplementary material for: The role of cecal metabolites and DNA methylation in deciphering the effects of maternal genistein intake on white fat browning in adult female offspring
Source: Royal Society of Chemistry journal article supplement (doi:10.1039/d4fo04761c), 2025-01-01
Supplement: d4fo04761c1.xlsx [file d4fo04761c1.xlsx]

## Sheet: S1
Table S1 The primer sequences of qRT-PCR for Ucp1, Ppargc1a, Ppara, Pparg, Prdm16 and Ppia.
Gene name	Forward primer (5'-3')	Reverse primer (5'-3')
Ucp1	TCTCTGCCAGGACAGTACCCAA	GAGTCGCAGAAAAGAAGCCACAA
Cidea	TGCTCTTCTGTATCGCCCAGT	GCCGTGTTAAGGAATCTGCTG
Ppargc1a	TATGGAGTGACATAGAGTGTGCT	CCACTTCAATCCACCCAGAAAG
Ppara	AGAGCCCCATCTGTCCTCTC	ACTGGTAGTCTGCAAAACCAAA
Pparg	TCGCTGATGCACTGCCTATG	GAGAGGTCCACAGAGCTGATT
Prdm16	CAGCACGGTGAAGCCATTC	GCGTGCATCCGCTTGTG
Ppia	GCTGGACCAAACACAAACGG	TCCTGGACCCAAAACGCTC
