# Supplementary material for: The role of cecal metabolites and DNA methylation in deciphering the effects of maternal genistein intake on white fat browning in adult female offspring
Source: Royal Society of Chemistry journal article supplement (doi:10.1039/d4fo04761c), 2025-01-01
Supplement: d4fo04761c2.xlsx [file d4fo04761c2.xlsx]

## Sheet: S2
Table S2 The primer sequences for amplifying target genes in MassArray methylation
Gene name	Forward primer (5'-3')	Reverse primer (5'-3')
Ucp1	aggaagagag TGGTTTAAGGTTGTTGAAGAGTGAT	cagtaatacgactcactatagggagaaggctCAAAAACAAAAAAACTCAACCCTAA
Cidea	aggaagagagGGGATTATGGTTTAGGGAGTAGAGA	cagtaatacgactcactatagggagaaggctTTAATAATATCACCAATCACCCCAA
Ppargc1a	aggaagagagAGGAATTATTGTATTTGAGAGAAGTTT	cagtaatacgactcactatagggagaaggctAACCAAATATTTCCTTTTCTTTCTTC
Pparg	aggaagagagGGTTTTTTATTTTAAAAGTTATTGGTG	cagtaatacgactcactatagggagaaggctTAAATCAACAAAAAAATCTCCCAAA
Ppara	aggaagagag AGGTGAAGGGATTGTTTAAGGTTAT	cagtaatacgactcactatagggagaaggctTCAATTAACAAAACCCCAATACCTA
Prdm16	aggaagagag GGGTTATTTGGGTTTTTTTAAAGTG	cagtaatacgactcactatagggagaaggctACCCAAAAACAACTACACACTATCTTC
